# Supplementary material
Source: PubMed Central journal article supplement (PMC3708862)
Supplement: NIHMS3166-supplement-Supplemental_Data.pdf [file NIHMS3166-supplement-Supplemental_Data.pdf]

## Supplemental Figure Legends

### Figure S1

Specificity of the phospho-Bcl-xL(Ser49) antibodies. Expression of phospho-HA-Bcl-xL(Ser49) in Namalwa cells expressing wt HA-Bcl-xL and HA-Bcl-xL(Ser49Ala) mutant exposed to VP16 (10  $\mu$ M for 30 min). HA-Bcl-xL expression is shown as control. In the right panels, antibodies were first incubated with excess phosphorylated peptide (CTESEMETP(pS)AING) prior to Western blotting.

### Figure S2

**A)** Co-localization of CDK1 with  $\gamma$ -tubulin and phospho-Bcl-xL(Ser49) with  $\gamma$ -tubulin, the centrosome bio-markers during the G2 arrest induced by VP16.

**B)** *In vitro* CDK1 kinase activity in the presence of recombinant Bcl-xL( $\Delta$ TM)(Ser49Asp) protein. CDK1 kinase activity assays were conducted as described in Supplemental Table S3 and quantitation performed by densitometry analysis of autoradiograms (40). Symbols and bars represent the means  $\pm$  s.e.m. of 6 independent experiments.

### Figure S3

*In vitro* kinase assays. **A)** Enzyme activities were tested on control substrates with recombinant purified kinases. Velocities are expressed as nmole/min/mg. 2 independent experiments are reported.

**B)** BubR1, Bub1, Bub3 and Cdk1(cdc2) enzyme activities tested on histone H1 and myelin basic protein control substrates with kinases purified by immunoprecipitation. 2 independent immunoprecipitation assays are reported.

C) Tandem mass spectra of phospho(Ser49) analysed using Mascot (Matrix Science, London, UK; version Mascot). Mascot was searched with a fragment ion mass tolerance of 0.50 Da and a parent ion tolerance of 2.0 Da. Scaffold (version Scaffold\_3\_00\_02, Proteome Software Inc., Portland, OR) was used to validate MS/MS based peptide and protein identifications. Peptide identifications were accepted if they could be established at greater than 95.0% probability. Validation of phosphate positions were conducted using Ascore. On that spectrum, Ascore score is of 42.65

## Supplemental Figure S1

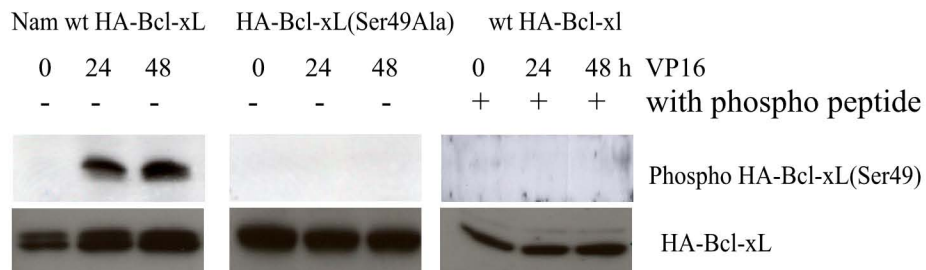

## Supplemental Figure S2

A) HeLa cells after 48 h VP16

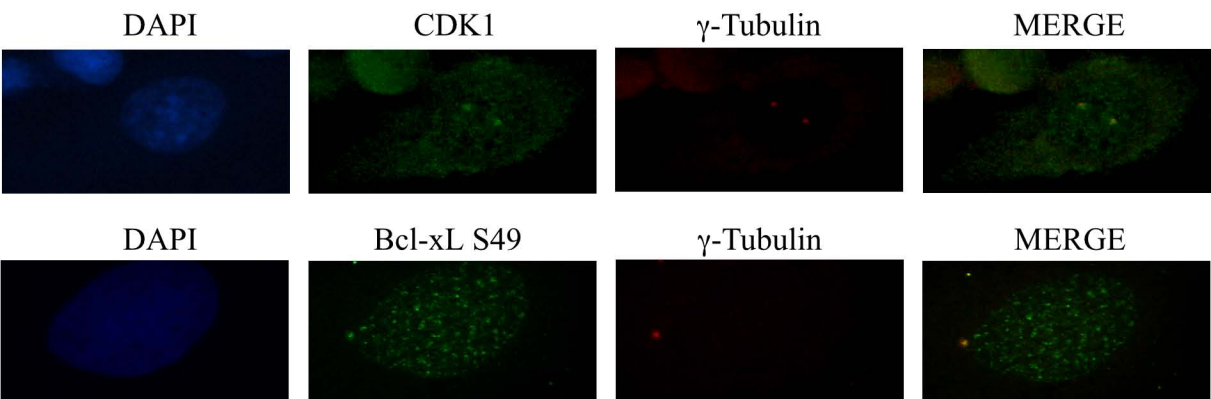

B) In vitro CDK1 kinase activity assay

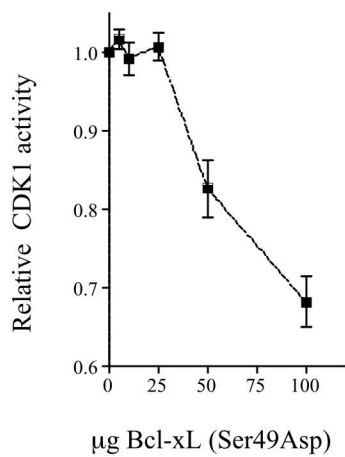

# Supplemental Figure S3

## A) Recombinant Enzyme

|                      | Specific activity |                   |
|----------------------|-------------------|-------------------|
|                      | Assay #1          | Assay #2          |
| CHK1                 | 7.7 nmole/min/mg  | 7.9 nmole/min/mg  |
| CHK2                 | 176 nmole/min/mg  | 268 nmole/min/mg  |
| p38 $\alpha$ /MAPK14 | 76 nmole/min/mg   | 129 nmole/min/mg  |
| JNK1/MAPK8           | 39 nmole/min/mg   | 48 nmole/min/mg   |
| JNK2/MAPK9           | 138 nmole/min/mg  | 263 nmole/min/mg  |
| MAPKAPK2             | 541 nmole/min/mg  | 778 nmole/min/mg  |
| PLK1                 | 8.4 nmole/min/mg  | 14.3 nmole/min/mg |
| PLK3                 | 13.9 nmole/min/mg | 17.5 nmole/min/mg |
| Aurora A             | 14.5 nmole/min/mg | 18 nmole/min/mg   |
| Aurora B             | 508 nmole/min/mg  | 420 nmole/min/mg  |
| NEK2                 | 398 nmole/min/mg  | 530 nmole/min/mg  |
| GSK3 $\beta$         | 5.0 nmole/min/mg  | 8.6 nmole/min/mg  |

## B) Immunoprecipitated enzyme

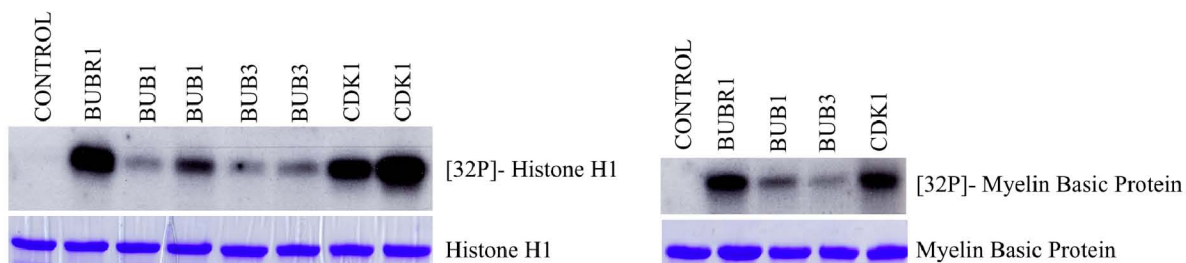

## C) MS/MS Spectrum

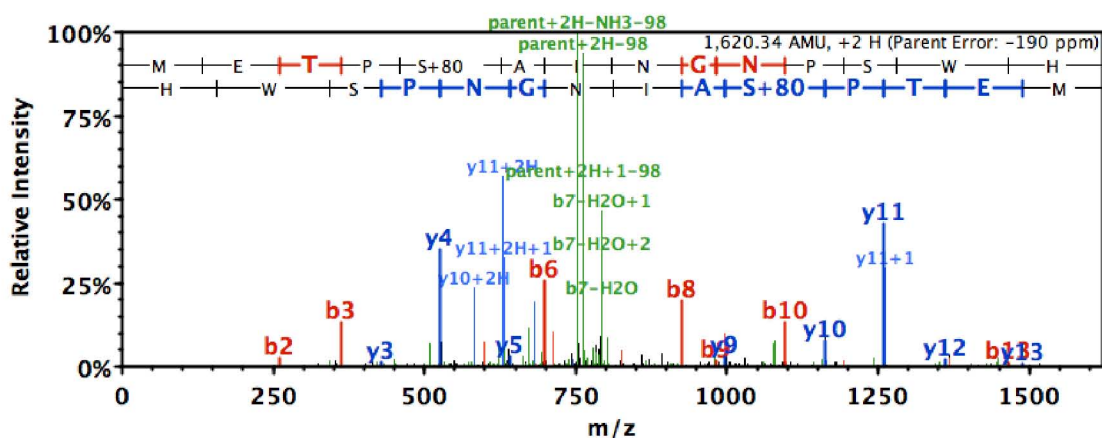

**SUPPLEMENTAL TABLE S1** Phase distribution *versus* labeling in synchronized human wt HeLa cells collected from 9 to 12 h after double thymidine block-release

| <b>Phospho<br/>Bcl-xL<br/>(S49)</b> | <b>PROMETAPHASE</b> | <b>METAPHASE</b> | <b>ANAPHASE</b> | <b>TELOPHASE</b> | <b>CYOKINESIS</b> | <b>TOTAL</b> |
|-------------------------------------|---------------------|------------------|-----------------|------------------|-------------------|--------------|
| + CENPA                             | 28/28 (-)           | 12/12 (-)        | 10/10 (-)       | 12/12 (-)        | 18/18 (-)         | 80           |
| + PLK1                              | 41/41 (-)           | 32/32 (-)        | 30/30 (-)       | 25/31 (-)        | 23/23 (-)         | 157          |
| + $\gamma$ -Tubulin                 | 20/28 (-)           | 23/23 (-)        | 13/13 (-)       | 10/16 (-)        | 12/15 (-)         | 95           |
| + Clip-170                          | 30/30 (-)           | 22/22 (-)        | 19/19 (-)       | 10/14 (-)        | 18/21 (-)         | 106          |
| + Dynein                            | 35/35 (-)           | 21/21 (-)        | 11/11 (-)       | 10/10 (+)        | 08/11 (+)         | 88           |
| + HEC1                              | 36/36 (-)           | 25/25 (-)        | 09/09 (-)       | 09/13 (-)        | 12/15 (-)         | 98           |

**Supplemental TABLE S2 : Listing of antibodies**

| <b>ANTIBODIES</b>          | <b>ID</b>       | <b>Species</b>      | <b>Source</b>      |
|----------------------------|-----------------|---------------------|--------------------|
| Cdc2/CDK1                  | # PC25          | rabbit pAb          | Calbiochem         |
| Cdc2/CDK1                  | clone 1/cdk1    | mouse mAb           | BD Biosciences     |
| Plk1                       | clone 208G4     | rabbit mAb          | Cell Signaling     |
| Plk3                       | clone B37-2     | mouse mAb           | BD Biosciences     |
| Aurora A                   | clone 1G4       | rabbit mAb          | Cell Signaling     |
| Aurora B                   | # 3094          | rabbit mAb          | Cell Signaling     |
| MAPKAPK2                   | # 3042          | rabbit pAb          | Cell Signaling     |
| MAPK14/SAPK p38 $\alpha$   | clone L53F8     | mouse mAb           | Cell Signaling     |
| MAPK8/ JNK1                | clone G151-333  | mouse mAb           | BD Biosciences     |
| MAPK9/ JNK2                | # 4672          | rabbit pAb          | Cell Signaling     |
| MPS1/TKK                   | # 3255          | rabbit pAb          | Cell Signaling     |
| MPS1/TKK                   | clone BC032858  | mouse mAb           | Abcam              |
| Bub1                       | clone 14H5      | mouse mAb           | Upstate/ Millipore |
| BubR1                      | # A300-386A     | rabbit pAb          | Bethyl             |
| BubR1                      | # 4116          | rabbit pAb          | Cell Signaling     |
| BubR1                      | clone9/BubR1    | mouse mAb           | BD Transduction    |
| Bub3                       | clone31/Bub3    | mouse mAb           | BD Transduction    |
| Bub3                       | # 3049          | rabbit pAb          | Cell Signaling     |
| Mad2                       | # A300-300A     | rabbit pAb          | Bethyl Lab         |
| Mad2                       | clone 48/Mad2   | mouse mAb           | BD Transduction    |
| cdc20                      | clone 41/p55cdc | mouse mAb           | BD Transduction    |
| cdc20                      | # A301-179A     | rabbit pAb          | Bethyl Lab         |
| cdc20                      | # A301-180A     | rabbit pAb          | Bethyl Lab         |
| CENP-A                     | # 07-574        | rabbit pAb          | Upstate/Millipore  |
| CENP-A                     | clone 3-19      | mouse mAb           | Assay Designs      |
| Dynein                     | clone 74.1      | mouse mAb           | Millipore          |
| HEC1                       | clone 9G3       | mouse mAb           | Abcam              |
| EB1                        | clone 5/ EB1    | mouse mAb           | BD Transduction    |
| Clip-170                   | custom          | from Niels Galjart, | Rotterdam          |
| Bcl-xL                     | clone 2H12      | mouse mAb           | BD Biosciences     |
| Phospho-BclxL Ser49        | custom          | rabbit pAb          | GenScript          |
| HA tag                     | clone 12CA5     | mouse mAb           | Roche Applied Sci  |
| HA tag                     | # A00168        | goat pAb            | GenScript          |
| $\gamma$ -tubulin          | clone GTU88     | mouse mAb           | Abcam              |
| $\beta$ -Actin             | clone 4C40      | mouse mAb           | Sigma              |
| Phospho H3(ser10)          | # 06-570        | rabbit pAb          | Upstate/Millipore  |
| Phospho H3 ser10 Alexa 488 | # 9708          | rabbit pAb          | Cell Signaling     |
| Anti-Mouse IgG Alexa 488   | # A11001        | goat pAb            | InVitroGen         |
| Anti-Rabbit IgG Alexa 488  | # A11008        | goat pAb            | InVitroGen         |
| Anti-Mouse IgG Alexa 594   | # A11005        | goat pAb            | InVitroGen         |
| Anti-Rabbit IgG Alexa 594  | #A11012         | goat pAb            | InVitroGen         |
| Anti-Mouse IgG HP-linked   | # NA931V        | sheep pAb           | GE Healthcare      |
| Anti-Rabbit IgG HP-linked  | # NA934V        | donkey pAb          | GE Healthcare      |
| Normal Rabbit IgG          | # sc-2027       | rabbit IgG          | Santa Cruz Biotech |
| Normal Mouse IgG           | # sc-2025       | mouse IgG           | Santa Cruz Biotech |

**Supplemental TABLE S3 : Listing of the protein kinase assays**

| <b>Recombinant Enzyme</b>        | <b>Source</b>  | <b>Control Substrate</b> | <b>Source</b>  | <b>Buffer</b> |
|----------------------------------|----------------|--------------------------|----------------|---------------|
| CHK1                             | Sigma-Aldrich  | RXR(X(L/A)S((R/F)        | Cell Signaling | A             |
| MAPK14/SAPK p38 $\alpha$         | Cell Signaling | ATF-2 (19-96)            | Cell Signaling | B             |
| MAPK8/ JNK1                      | Cell Signaling | c-Jun (1-89)             | Cell Signaling | B+            |
| MAPK9/ JNK2                      | Cell Sciences  | c-Jun (1-89)             | Cell Signaling | A             |
| MAPKAPK2                         | Cell Signaling | KKKLNRTLVA               | AnaSpec        | A+            |
| PLK1                             | Cell Signaling | RISDELMDATFADQEAK        | AnaSpec        | A             |
| PLK3                             | Cell Signaling | RISDELMDATFADQEAK        | AnaSpec        | A             |
| Aurora A                         | Cell Signaling | RRSLE                    | Cell Signaling | A             |
| Aurora B                         | Cell Signaling | LRRLSLGLRRLSLGLRRL       |                |               |
|                                  |                | SLGLRRLSLG               | AnaSpec        | A             |
| NEK2                             | Cell Signaling | RFRRSRMI                 | AnaSpec        | A             |
| GSK3 $\alpha$                    | Cell Signaling | RRAAEELDSRAGSPQL         | AnaSpec        | A             |
| GSK3 $\beta$                     | Sigma-Aldrich  | GPHRSTPESRAAV            | AnaSpec        | A+            |
| Mps1                             | Cell Signaling | Myelin basic protein     | Sigma-Aldrich  | B             |
| <b>Immunoprecipitated Enzyme</b> |                |                          |                |               |
| CDC2/CDK1                        | Namalwa cells  | Histone H1/ MBP          | Sigma-Aldrich  | B+            |
| Bub1                             | Namalwa cells  | Histone H1/MBP           | Sigma-Aldrich  | B+            |
| BubR1                            | Namalwa cells  | Histone H1/MBP           | Sigma-Aldrich  | B+            |
| Bub3                             | Namalwa cells  | Histone H1/ MBP          | Sigma-Aldrich  | B+            |

Buffer A (5x): 25 mM MOPS pH 7.2  
 25 mM MgCl<sub>2</sub>  
 12.5 mM  $\beta$ -glycerol-2-phosphate  
 0.5 mM Na<sub>3</sub>VO<sub>4</sub>  
 5 mM EGTA  
 2 mM EDTA  
 0.25 mM dithiothreitol  
 500  $\mu$ M ATP\*  
 \* 0.05  $\mu$ Ci/ $\mu$ l [<sup>32</sup>P]- $\gamma$ ATP  
 Buffer A+ (5x): buffer A + 50  $\mu$ g/ ml BSA

Buffer B (5x): 125 mM TRIS pH 7.2  
 50 mM MgCl<sub>2</sub>  
 25 mM  $\beta$ -glycerol-2-phosphate  
 0.5 mM Na<sub>3</sub>VO<sub>4</sub>  
 10 mM dithiothreitol  
 500  $\mu$ M ATP\*  
 \* 0.05  $\mu$ Ci/ $\mu$ l [<sup>32</sup>P]- $\gamma$ ATP  
 Buffer B+ (5x): buffer B + 50  $\mu$ g/ ml BSA
